# Supplementary material
Source: Springer Nature journal article supplement (https://www.springermedizin.de/resource/supplementary/12879_2005_303_MOESM2_ESM.pdf/9448728)

## Durations of symptoms and CD 4 levels

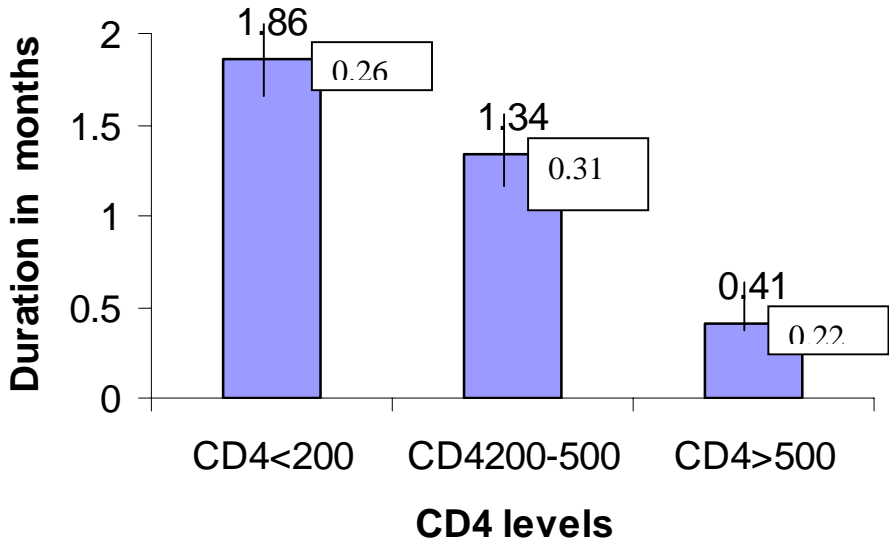

Supplement: MOESM2 [file 9448728]
